# Supplementary material
Source: publisher figshare collection journal article supplement (https://tandf.figshare.com/ndownloader/files/21538557)
Supplement: Supplementary file 1 [file 21538557]

Curricular implementation of clinical reasoning

**Dear colleagues,**

**With this survey, we would like to get an overview of how clinical reasoning skills are deliberately taught in healthcare curricula worldwide in order to identify future needs. Clinical reasoning includes gathering, interpreting, and synthesizing information, generating hypotheses and diagnoses, developing management and treatment plans, avoiding cognitive errors, and ensuring patient safety. Please share - to the best of your knowledge - how these aspects are taught in your curriculum. We appreciate your insights on this and we estimate that the survey completion will take about ten minutes of your valuable time.**

**Thank you for your participation!**

1. In which country do you work?

Country

2. How would you describe your primary role/roles at your institution?  
(multiple answers possible)

☐ Healthcare Professions Educator

☐ Dean

☐ Physician

☐ Curriculum Planner/Manager

☐ Nurse

☐ Course Director

☐ Physiotherapist

☐ Student

☐ Researcher

Other (please specify)

3. How many years of experience in healthcare education (excluding years of study) do you have?

4. In your curriculum, which of the following aspects are taught and assessed with an **explicit** focus on clinical reasoning and how **relevant** do you rate these?

|                                                                                            | Is taught            | Is assessed          | I consider it relevant for the curriculum |
|--------------------------------------------------------------------------------------------|----------------------|----------------------|-------------------------------------------|
| Gathering, interpreting, and synthesizing patient information                              | <input type="text"/> | <input type="text"/> | <input type="text"/>                      |
| Generating differential diagnoses including defining and discriminating features           | <input type="text"/> | <input type="text"/> | <input type="text"/>                      |
| Developing a diagnostic plan                                                               | <input type="text"/> | <input type="text"/> | <input type="text"/>                      |
| Developing a treatment plan                                                                | <input type="text"/> | <input type="text"/> | <input type="text"/>                      |
| Errors in the clinical reasoning process and strategies to avoid them                      | <input type="text"/> | <input type="text"/> | <input type="text"/>                      |
| Theories of clinical reasoning (e.g. knowledge encapsulation, illness scripts, ...)        | <input type="text"/> | <input type="text"/> | <input type="text"/>                      |
| Strategies to learn clinical reasoning (e.g. heuristics, rule out worst case scenario,...) | <input type="text"/> | <input type="text"/> | <input type="text"/>                      |
| Interprofessional aspects of clinical reasoning (e.g. collaborative reasoning)             | <input type="text"/> | <input type="text"/> | <input type="text"/>                      |

Other (please specify)

5. How is clinical reasoning taught in your curriculum in sessions with a **main focus** on clinical reasoning? (multiple answers possible)

- |                                                                      |                                                         |
|----------------------------------------------------------------------|---------------------------------------------------------|
| <input type="checkbox"/> Lectures                                    | <input type="checkbox"/> Morning rounds                 |
| <input type="checkbox"/> Problem-based learning                      | <input type="checkbox"/> Morbidity and mortality rounds |
| <input type="checkbox"/> Bedside teaching                            | <input type="checkbox"/> Clerkships                     |
| <input type="checkbox"/> Virtual Patients (Interactive online cases) |                                                         |
| <input type="checkbox"/> Other (please specify)                      |                                                         |

6. How **should** clinical reasoning be taught in your curriculum in sessions with a **main focus** on clinical reasoning? (multiple answers possible)

- |                                                                      |                                                         |
|----------------------------------------------------------------------|---------------------------------------------------------|
| <input type="checkbox"/> Lectures                                    | <input type="checkbox"/> Morning rounds                 |
| <input type="checkbox"/> Problem-based learning                      | <input type="checkbox"/> Morbidity and mortality rounds |
| <input type="checkbox"/> Bedside teaching                            | <input type="checkbox"/> Clerkships                     |
| <input type="checkbox"/> Virtual Patients (Interactive online cases) |                                                         |
| <input type="checkbox"/> Other (please specify)                      |                                                         |

7. In your curriculum, in which years are aspects of clinical reasoning **explicitly** taught? (multiple answers are possible)

- |                                 |                                     |
|---------------------------------|-------------------------------------|
| <input type="checkbox"/> Year 1 | <input type="checkbox"/> Year 5     |
| <input type="checkbox"/> Year 2 | <input type="checkbox"/> Year 6     |
| <input type="checkbox"/> Year 3 | <input type="checkbox"/> Don't know |
| <input type="checkbox"/> Year 4 |                                     |

8. Is there an explicit longitudinal curriculum on clinical reasoning?

- |                           |                                  |
|---------------------------|----------------------------------|
| <input type="radio"/> Yes | <input type="radio"/> Don't know |
| <input type="radio"/> No  |                                  |

Please describe

9. Do you think such an explicit longitudinal clinical reasoning curriculum is necessary for educating healthcare students?

- |                           |                                  |
|---------------------------|----------------------------------|
| <input type="radio"/> Yes | <input type="radio"/> Don't know |
| <input type="radio"/> No  |                                  |

Why or why not?

10. How is clinical reasoning assessed in your curriculum? (multiple answers possible)

- |                                                                   |                                                                     |
|-------------------------------------------------------------------|---------------------------------------------------------------------|
| <input type="checkbox"/> Written exam (e.g. key feature approach) | <input type="checkbox"/> Workplace-based assessments (e.g. MiniCEX) |
| <input type="checkbox"/> Clinical exam (e.g. OSCE)                | <input type="checkbox"/> Don't know                                 |
| <input type="checkbox"/> Other (please specify)                   |                                                                     |

11. How **should** clinical reasoning be assessed in your curriculum? (multiple answers possible)

- |                                                                   |                                                                     |
|-------------------------------------------------------------------|---------------------------------------------------------------------|
| <input type="checkbox"/> Written exam (e.g. key feature approach) | <input type="checkbox"/> Workplace-based assessments (e.g. MiniCEX) |
| <input type="checkbox"/> Clinical exam (e.g. OSCE)                | <input type="checkbox"/> Don't know                                 |
| <input type="checkbox"/> Other (please specify)                   |                                                                     |

12. Do you have a train-the-trainer program/course for clinicians and/or faculty on how to teach clinical reasoning to students?

- |                           |                                  |
|---------------------------|----------------------------------|
| <input type="radio"/> Yes | <input type="radio"/> Don't know |
| <input type="radio"/> No  |                                  |

Comment

13. Do you think a train-the-trainer course on how to teach clinical reasoning is necessary for healthcare educators?

- |                           |                                  |
|---------------------------|----------------------------------|
| <input type="radio"/> Yes | <input type="radio"/> Don't know |
| <input type="radio"/> No  |                                  |

Comment

14. What, in your opinion, are the main barriers/ challenges for introducing a clinical reasoning curriculum? (choose all that apply)

- |                                                                                |                                                                                                 |
|--------------------------------------------------------------------------------|-------------------------------------------------------------------------------------------------|
| <input type="checkbox"/> No particular challenges                              | <input type="checkbox"/> Lack of guidelines for clinical reasoning curriculum development       |
| <input type="checkbox"/> Lack of qualified faculty to teach clinical reasoning | <input type="checkbox"/> Lack of awareness of the need for explicit clinical reasoning teaching |
| <input type="checkbox"/> Lack of curricular time                               | <input type="checkbox"/> Perception that clinical reasoning cannot be taught                    |
| <input type="checkbox"/> Lack of financial resources                           | <input type="checkbox"/> Don't know                                                             |
| <input type="checkbox"/> Other (please specify)                                |                                                                                                 |

15. What should a train-the-trainer course on clinical reasoning cover? (choose all that apply)

- |                                                                                                           |                                                                                                |
|-----------------------------------------------------------------------------------------------------------|------------------------------------------------------------------------------------------------|
| <input type="checkbox"/> Literature on clinical reasoning                                                 | <input type="checkbox"/> Technology-enhanced methods (such as Virtual Patients, e-learning...) |
| <input type="checkbox"/> Theory on clinical reasoning                                                     | <input type="checkbox"/> Common errors in the clinical reasoning process                       |
| <input type="checkbox"/> Clinical reasoning strategies                                                    | <input type="checkbox"/> Assessment methods of clinical reasoning                              |
| <input type="checkbox"/> Teaching methods on the wards and/or clinic                                      | <input type="checkbox"/> Cognitive errors and biases and strategies on how to avoid them       |
| <input type="checkbox"/> Teaching methods for face-to-face courses (e.g. seminars, PBL courses, lectures) | <input type="checkbox"/> Don't know                                                            |
| <input type="checkbox"/> Other (please specify)                                                           |                                                                                                |

16. Do you have any further comments?

Thank you for your responses! If you have questions regarding the questionnaire, please do not hesitate to contact us at [inga.hege@med.uni-augsburg.de](mailto:inga.hege@med.uni-augsburg.de)
